# Supplementary material for: Determination of the Predictive Roles and Potentially Pathogenic Antigen Epitopes of α-Enolase Related to the Development of Miscarriage in Females with Autoimmune Thyroiditis
Source: MDPI journal article supplement (doi:10.3390/ijms24021021), 2023-01-05
Supplement: s1 [file s1]

Table S1. Characteristics of representative participants in the study of serum P1-P18 antigenic epitopes antibodies.

|                                 | Group                 |                       |                       |                       | P value                         |                                 |                 |                 |
|---------------------------------|-----------------------|-----------------------|-----------------------|-----------------------|---------------------------------|---------------------------------|-----------------|-----------------|
|                                 | Non-AIT               |                       | AIT                   |                       | Non-AIT                         | AIT                             | Non-miscarriage | Miscarriage     |
|                                 | Non-miscarriage (n=8) | Miscarriage (n=8)     | Non-miscarriage (n=8) | Miscarriage (n=8)     | Miscarriage vs. non-miscarriage | Miscarriage vs. non-miscarriage | AIT vs. non-AIT | AIT vs. non-AIT |
| Age, years                      | 27.5±3.3              | 32.3±4.6              | 26.4±4.2              | 30.5±4.0              | NS                              | NS                              | NS              | NS              |
| Gestational age, weeks          | 5.5(5.0-7.0)          | 5.0(4.3-7.0)          | 6.0(5.3-7.0)          | 5.5(4.3-6.0)          | NS                              | NS                              | NS              | NS              |
| BMI, Kg/m <sup>2</sup>          | 21.7(19.2-22.6)       | 23.5(22.0-25.5)       | 24.0(21.5-24.8)       | 21.2(19.4-26.9)       | NS                              | NS                              | NS              | NS              |
| Smoking (%)                     | 1 (12.5)              | 1 (12.5)              | 0 (0)                 | 0 (0)                 | NS                              | NS                              | NS              | NS              |
| Drinking (%)                    | 1 (12.5)              | 0 (0)                 | 0 (0)                 | 0 (0)                 | NS                              | NS                              | NS              | NS              |
| TSH, mIU/L                      | 2.06(1.07-2.38)       | 1.6(1.48-2.29)        | 2.34(1.55-2.97)       | 2.59(2.16-3.63)       | NS                              | NS                              | NS              | NS              |
| FT4, pmol/L                     | 16.78±2.28            | 15.66±1.40            | 16.50±1.66            | 15.56±1.30            | NS                              | NS                              | NS              | NS              |
| TPOAb, IU/ml                    | 5.46(5.00-13.60)      | 8.47(6.18-11.89)      | 321.35(152.58-536)    | 231.05(180.23-367.9)  | NS                              | NS                              | 0.001           | 0.001           |
| TgAb, IU/ml                     | 38.41(11.53-76.91)    | 14.19(12.25-20.06)    | 327.05(276.85-429.53) | 272.30(205.10-404.95) | NS                              | NS                              | 0.001           | 0.001           |
| Serum ferritin, µg/L            | 44.72(36.91-111.46)   | 65.37(39.84-114.05)   | 71.46(51.19-115.53)   | 62.865(53.66-75.80)   | NS                              | NS                              | NS              | NS              |
| Urinary iodine/creatinine, µg/g | 104.63(59.72-131.76)  | 127.78(102.14-155.12) | 79.73(63.42-102.36)   | 93.47(72.22-114.501)  | NS                              | NS                              | NS              | NS              |

The skewed distributed variables are reported as the median (25-75th percentiles) for continuous variables. The above data are presented as n (%) for categorical variables or median (25-75th percentiles) for continuous variables. *P* value less than (0.05/4 = 0.0125) is considered statistically significant after corrected for multiple comparisons using chi-square test.

The Mann-Whitney U test was used to analyze variables with a skewed distribution. Differences were considered statistically significant if *P* < 0.05 for two groups or *P* < (0.05/3=0.017 or

0.05/4=0.0125) for adjusted  $P$  value for multiple comparisons.

NS, non-significant.
